# Supplementary material for: Smac mimetic suppresses tunicamycin-induced apoptosis via resolution of ER stress
Source: Springer Nature journal article supplement (doi:10.1038/s41419-019-1381-z), 2019-02-15
Supplement: MOESM1 [file 41419_2019_1381_MOESM1_ESM.pdf]

sFig. 1

A

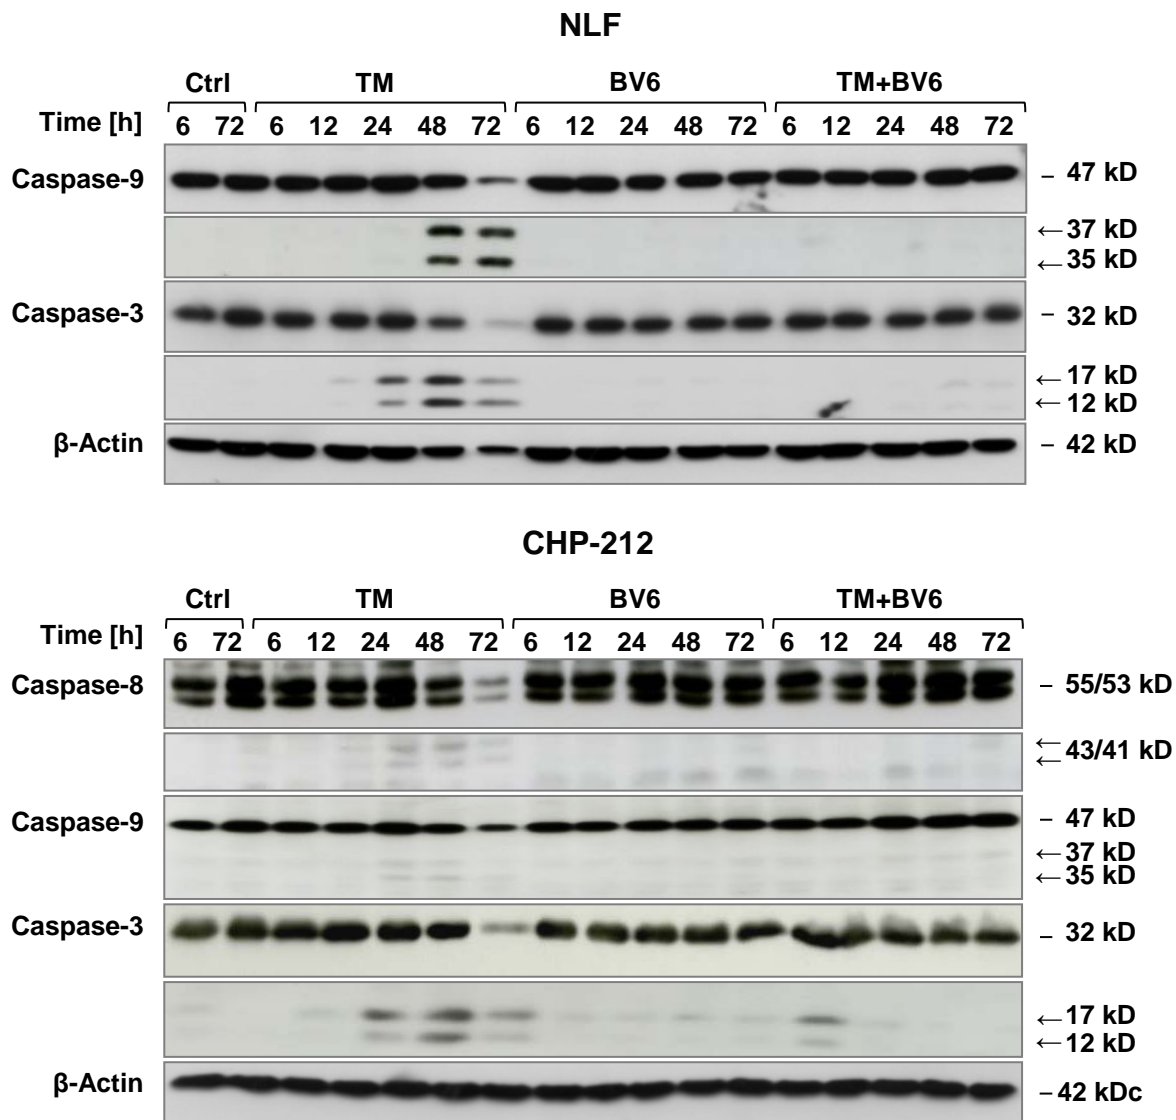

B

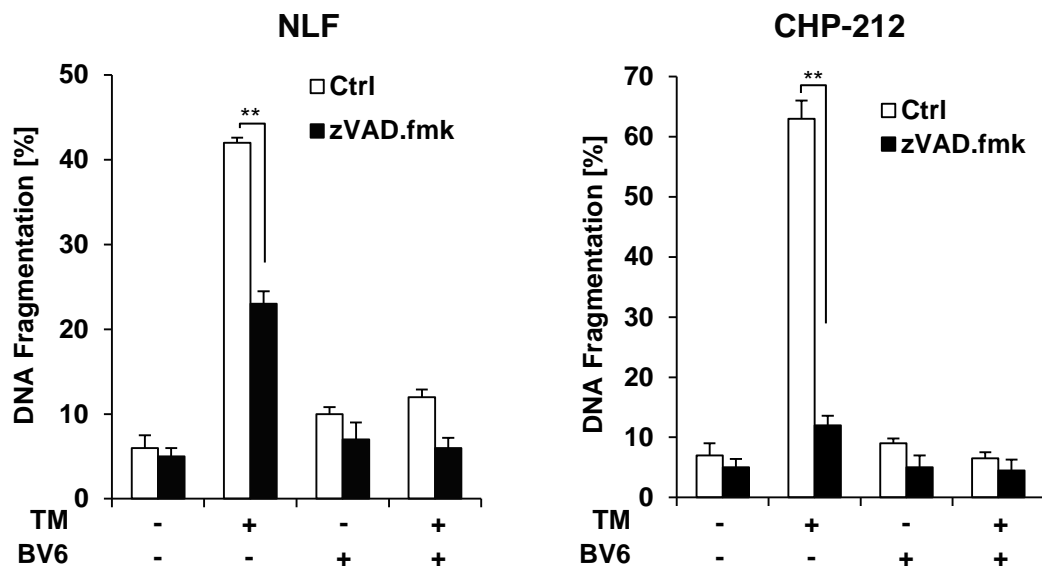

sFig. 2

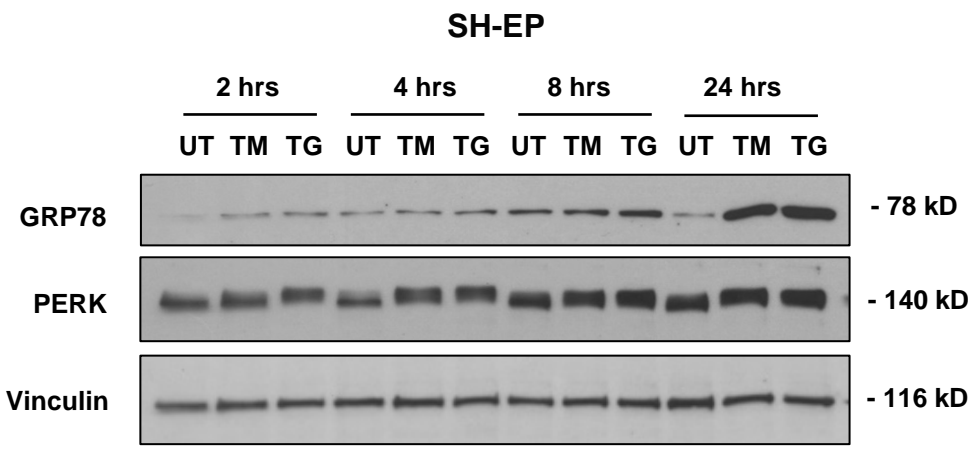

sFig. 3

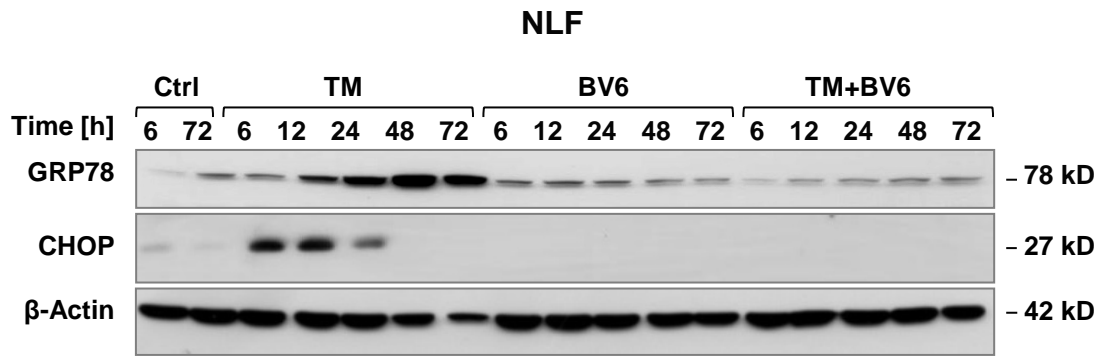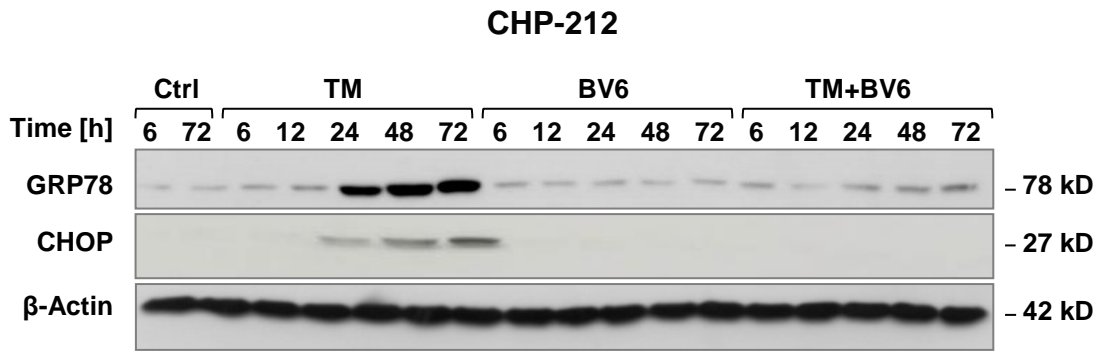

sFig. 4

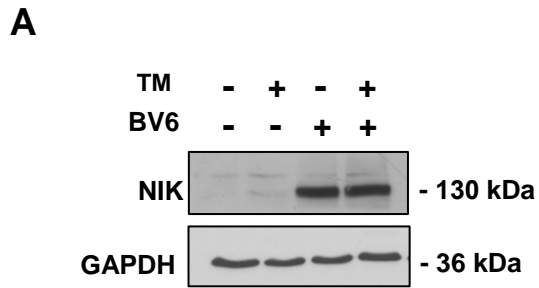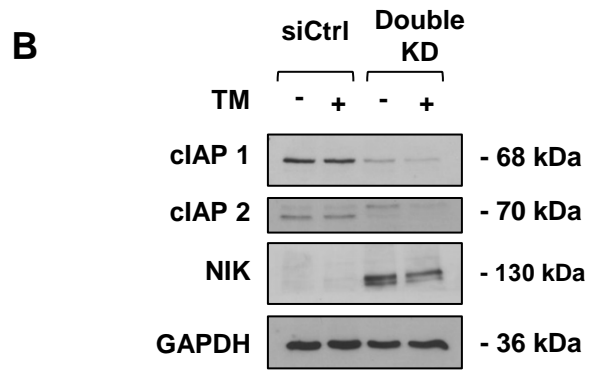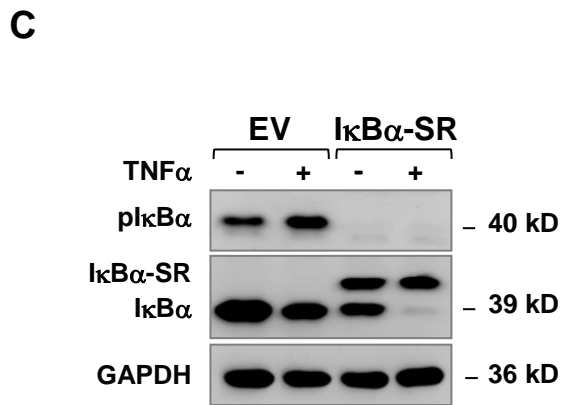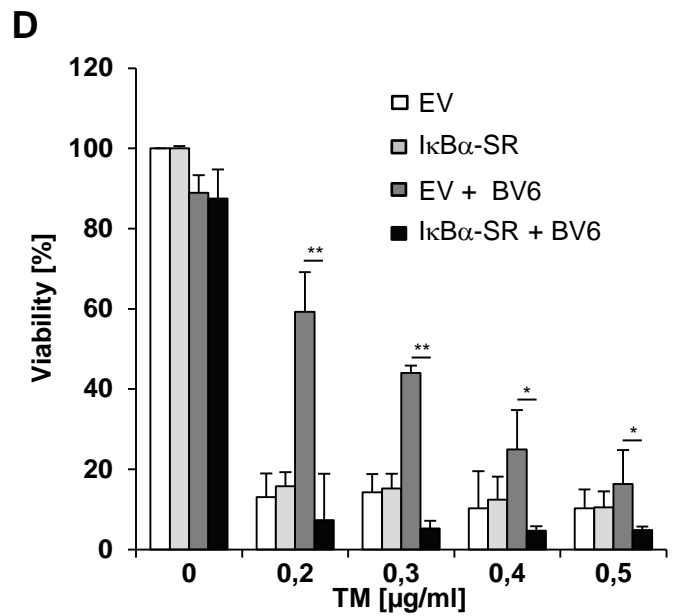

Suppl. Table 1. Primer sequences

| Primer          | Sequence (5' - 3')        |
|-----------------|---------------------------|
| h28S_forward    | ttgaaaatccgggggagag       |
| h28S_reverse    | acattgtccaacatgccag       |
| hCHOP_forward   | aaggcactgagcgtatcatgt     |
| hCHOP_reverse   | tgaagatacacttccttctgaacac |
| hDPAGT1_forward | ttccccttctgaactgct        |
| hDPAGT1_reverse | cacctatcagggccacaaat      |
| hGRP78_forward  | cagcctggcgacaagagt        |
| hGRP78_reverse  | ccttgggcagtattggattc      |
| hXBP1_forward   | ttacgagagaaaactcatggcc    |
| hXBP1_reverse   | gggtccaagttgtccagaatgc    |

Suppl. Table 2. Lectin microarray list

| Lectin       | Organism                         | Common name                    | Type     | Print in | Specificity                                                            |
|--------------|----------------------------------|--------------------------------|----------|----------|------------------------------------------------------------------------|
| AIA, Jacalin | <i>Artocarpus integrifolia</i>   | Jack fruit lectin              | Plant    | Gal      | Gal (sialylation tolerant)                                             |
| RPbAI        | <i>Robinia pseudoacacia</i>      | Black locust lectin            | Plant    | Gal      | Gal, GalNAc                                                            |
| SNA-II       | <i>Sambucus nigra</i>            | Sambucus lectin-II             | Plant    | Gal      | Gal/GalNAc                                                             |
| SJA          | <i>Sophora japonica</i>          | Pagoda tree lectin             | Plant    | Gal      | $\beta$ -GalNAc                                                        |
| DBA          | <i>Dolichos biflorus</i>         | Horse gram lectin              | Plant    | Gal      | GalNAc                                                                 |
| GHA          | <i>Glechoma hederacea</i>        | Ground ivy lectin              | Plant    | Gal      | GalNAc                                                                 |
| SBA          | <i>Glycine max</i>               | Soy bean lectin                | Plant    | Gal      | GalNAc                                                                 |
| VVA          | <i>Vicia villosa</i>             | Hairy vetch lectin             | Plant    | Gal      | GalNAc                                                                 |
| BPA          | <i>Bauhinia purpurea</i>         | Camel's foot tree lectin       | Plant    | Gal      | GalNAc/Gal                                                             |
| WFA          | <i>Wisteria floribunda</i>       | Japanese wisteria lectin       | Plant    | Gal      | GalNAc/sulfated GalNAc                                                 |
| HPA          | <i>Helix pomatia</i>             | Garden snail lectin            | Animal   | Gal      | $\alpha$ -GalNAc                                                       |
| GSL-I-A4     | <i>Griffonia simplicifolia</i>   | Griffonia lectin-I A4          | Plant    | Gal      | GalNAc                                                                 |
| ACA          | <i>Amaranthus caudatus</i>       | Amaranthin                     | Plant    | Lac      | Sialylated/Gal- $\beta$ -(1,3)-GalNAc                                  |
| ABL          | <i>Agaricus bisporus</i>         | Edible mushroom lectin         | Fungus   | Lac      | Gal- $\beta$ -(1,3)-GalNAc, GlcNAc                                     |
| PNA          | <i>Arachis hypogaea</i>          | Peanut lectin                  | Plant    | Gal      | Gal- $\beta$ -(1,3)-GalNAc                                             |
| GSL-II       | <i>Griffonia simplicifolia</i>   | Griffonia/Bandeiraea lectin-II | Plant    | GlcNAc   | GlcNAc                                                                 |
| sWGA         | <i>Triticum vulgare</i>          | Succinyl WGA                   | Plant    | GlcNAc   | GlcNAc                                                                 |
| DSA          | <i>Datura stramonium</i>         | Jimson weed lectin             | Plant    | GlcNAc   | GlcNAc                                                                 |
| STA          | <i>Solanum tuberosum</i>         | Potato lectin                  | Plant    | GlcNAc   | GlcNAc oligomers                                                       |
| LEL          | <i>Lycopersicon esculentum</i>   | Tomato lectin                  | Plant    | GlcNAc   | GlcNAc- $\beta$ -(1,4)-GlcNAc                                          |
| Calsepa      | <i>Calystegia sepium</i>         | Bindweed lectin                | Plant    | Man      | Man/Maltose                                                            |
| NPA          | <i>Narcissus pseudonarcissus</i> | Daffodil lectin                | Plant    | Man      | $\alpha$ -(1,6)-Man                                                    |
| GNA          | <i>Galanthus nivalis</i>         | Snowdrop lectin                | Plant    | Man      | Man- $\alpha$ (1,3)-                                                   |
| HHA          | <i>Hippeastrum hybrid</i>        | Amaryllis agglutinin           | Plant    | Man      | Man- $\alpha$ (1,3)-Man- $\alpha$ (1,6)-                               |
| ConA         | <i>Canavalia ensiformis</i>      | Jack bean lectin               | Plant    | Man      | Man, Glc, GlcNAc                                                       |
| Lch-B        | <i>Lens culinaris</i>            | Lentil isolectin B             | Plant    | Man      | Man, fucose dependent                                                  |
| Lch-A        | <i>Lens culinaris</i>            | Lentil isolectin A             | Plant    | Man      | Man, fucose dependent                                                  |
| PSA          | <i>Pisum sativum</i>             | Pea lectin                     | Plant    | Man      | Man, fucose dependent                                                  |
| TJA-I        | <i>Trichosanthes japonica</i>    | TJA One                        | Plant    | Lac      | Sialic acid- $\alpha$ -(2,6)-Gal(NAc)                                  |
| WGA          | <i>Triticum vulgare</i>          | Wheat germ agglutinin          | Plant    | GlcNAc   | NeuAc/GlcNAc                                                           |
| MAA          | <i>Maackia amurensis</i>         | Maackia agglutinin             | Plant    | Lac      | Sialic acid- $\alpha$ -(2,3)-Gal(NAc)                                  |
| SNA-I        | <i>Sambucus nigra</i>            | Sambucus lectin-I              | Plant    | Lac      | Sialic acid- $\alpha$ -(2,6)-Gal(NAc)                                  |
| CCA          | <i>Cancer antennarius</i>        | California crab                | Animal   | Lac      | 9- O-acetyl-sialic acid                                                |
| PHA-L        | <i>Phaseolus vulgaris</i>        | Kidney bean leucoagglutinin    | Plant    | Lac      | tri-/tetra-antennary $\beta$ -Gal/Gal- $\beta$ -(1,4)-GlcNAc           |
| PHA-E        | <i>Phaseolus vulgaris</i>        | Kidney bean erythroagglutinin  | Plant    | Gal      | biantennary, bisecting GlcNAc, $\beta$ -Gal/Gal- $\beta$ -(1,4)-GlcNAc |
| RCA-I/120    | <i>Ricinus communis</i>          | Castor bean lectin I           | Plant    | Gal      | Gal- $\beta$ -(1,4)-GlcNAc                                             |
| AMA          | <i>Arum maculatum</i>            | Lords and Ladies agglutinin    | Plant    | Lac      | Gal- $\beta$ -(1,4)-GlcNAc                                             |
| CPA          | <i>Cicer arietinum</i>           | Chickpea lectin                | Plant    | Lac      | Complex glycopeptides                                                  |
| CAA          | <i>Caragana arborescens</i>      | Pea tree lectin                | Plant    | Lac      | Gal- $\beta$ -(1,4)-GlcNAc                                             |
| ECA          | <i>Erythrina cristagalli</i>     | Cocks comb/coral tree lectin   | Plant    | Lac      | Gal- $\beta$ -(1,4)-GlcNAc oligomers                                   |
| TJA-II       | <i>Trichosanthes japonica</i>    | TJA Two                        | Plant    | Gal      | Fuc- $\alpha$ (1,2)Gal(NAc)- $\beta$ (1,4)                             |
| AAL          | <i>Aleuria aurantia</i>          | Orange peel fungus lectin      | Fungus   | Fuc      | $\alpha$ -(1,6)-linked Fuc                                             |
| LTA          | <i>Lotus tetragonolobus</i>      | Lotus lectin                   | Plant    | Fuc      | $\alpha$ -(1,3)-linked Fuc                                             |
| UEA-I        | <i>Ulex europaeus</i>            | Gorse lectin-I                 | Plant    | Fuc      | $\alpha$ -(1,2)-linked Fuc                                             |
| PA-I         | <i>Pseudomonas aeruginosa</i>    | Pseudomonas lectin             | Bacteria | Gal      | Gal, Gal derivatives                                                   |
| EEA          | <i>Euonymus europaeus</i>        | Spindle tree lectin            | Plant    | Gal      | $\alpha$ -Gal                                                          |
| GSL-I-B4     | <i>Griffonia simplicifolia</i>   | Griffonia/Bandeiraea lectin-I  | Plant    | Gal      | $\alpha$ -Gal                                                          |
| MPA          | <i>Maclura pomifera</i>          | Osage orange lectin            | Plant    | Gal      | $\alpha$ -Gal                                                          |
| VRA          | <i>Vigna radiata</i>             | Mung Bean Lectin               | Plant    | Gal      | $\alpha$ -Gal                                                          |
| MOA          | <i>Marasmius oreades</i>         | Fairy ring mushroom lectin     | Fungus   | Gal      | $\alpha$ -Gal                                                          |
| PBS          | N/A                              | N/A                            | N/A      | NS       | N/A                                                                    |
| BSA          | N/A                              | N/A                            | Animal   | NS       | N/A                                                                    |

## **Supplemental Figure legends**

### **Suppl. Figure 1. BV6 inhibits TM-induced caspase activation and caspase-dependent apoptosis in neuroblastoma cells.**

**(A)** NLF and CHP-212 cells were treated for indicated times with TM (NLF: 0.1 µg/ml; CHP-212: 0.2 µg/ml) and/or 5 µM BV6. Caspase activation was analyzed by Western blotting, cleavage fragments are indicated by arrows.

**(B)** NLF and CHP-212 cells were treated for 72 hours with TM (NLF: 0.1 µg/ml; CHP-212: 0.2 µg/ml) and/or 5 µM BV6 in the presence or absence of 20 µM zVAD.fmk. Apoptosis was determined by flow cytometric analysis of DNA fragmentation of PI-stained nuclei. Mean+SEM of three independent experiments performed in triplicate are shown; \*\*P<0.01.

### **Suppl. Figure 2. Effect of TM and TG on the UPR and ER stress.**

SH-EP cells were left untreated (UT) or were treated for indicated times with 0.4 µg/ml TM and/or 2.5 µM TG. Expression of GRP78 and phospho-PERK (indicated by upward band shift) was analyzed by Western blotting; Vinculin served as loading control.

### **Suppl. Figure 3. BV6 resolves TM-induced UPR.**

NLF and CHP-212 neuroblastoma cells were treated for indicated times with TM (NLF: 0.1 µg/ml; CHP-212: 0.2 µg/ml) and/or 5 µM BV6. Expression levels of CHOP and GRP78 were evaluated by Western blotting. Expression of β-actin served as loading control.

**Suppl. Figure 4. Involvement of NF- $\kappa$ B signaling.**

**(A)** SH-EP cells were treated for six hours with 0.4  $\mu$ g/ml TM and/or 4  $\mu$ M BV6. Expression of NIK was analyzed by Western blotting, GAPDH served as loading control.

**(B)** SH-EP cells were transiently transfected with siRNAs against cIAP1 and cIAP2 or with control siRNA and were treated with 0.4  $\mu$ g/ml TM. Expression of NIK was analyzed by Western blotting, GAPDH served as loading control.

**(C)** SH-EP cells stably expressing I $\kappa$ B $\alpha$ -SR or empty vector (EV) were treated with 10 ng/ml TNF $\alpha$  for one hour. Expression of I $\kappa$ B $\alpha$ , I $\kappa$ B $\alpha$ -SR and phospho-I $\kappa$ B $\alpha$  was assessed by Western blotting, GAPDH served as loading control.

**(D)** SH-EP cells stably expressing I $\kappa$ B $\alpha$ -SR or vector control were treated for 72 hours with 0.4  $\mu$ g/ml TM and/or 4  $\mu$ M BV6. Cell viability was assessed by MTT assay and is expressed as the percentage of untreated controls. Mean + SEM of three independent experiments performed in triplicate are shown; \*P<0.05; \*\*P<0.001.

**Suppl. Table 1. Primer sequences.****Suppl. Table 2. Lectin microarray list.**
